# Supplementary material for: Identifying G-quadruplex-binding ligands using DNA-functionalized gold nanoparticles
Source: Royal Society of Chemistry journal article supplement (doi:10.1039/c2an16051j), 2012-01-01
Supplement: c2an16051j.pdf [file c2an16051j.pdf]

## **Electronic Supplementary Information**

### **Identifying G-quadruplex-binding ligands using DNA-functionalized gold nanoparticles**

Yunxia Qiao, Jing Deng, Yan Jin<sup>\*</sup>, Guozhen Chen, Lin Wang,

Key Laboratory of Applied Surface and Colloid Chemistry, Ministry of Education, Key Laboratory of Analytical Chemistry for Life Science of Shaanxi Province, School of Chemistry and Materials Science Shaanxi Normal University, Xi'an 710062, China. Fax: (+) 86-29-81530727; E-mail: jinyan@snnu.edu.cn

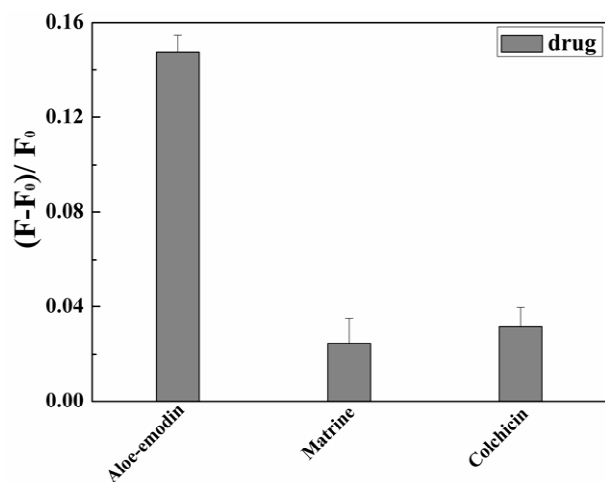

Fig. S1 The bar chart of fluorescence response of different drugs to F-GDNA/cDNA-GNPs mixtures in the presence of 0.1g/L BSA, where  $F_0$  and  $F$  are the FAM fluorescence intensities in the absence and presence of drugs, respectively. The concentration of drug is 500 nM.

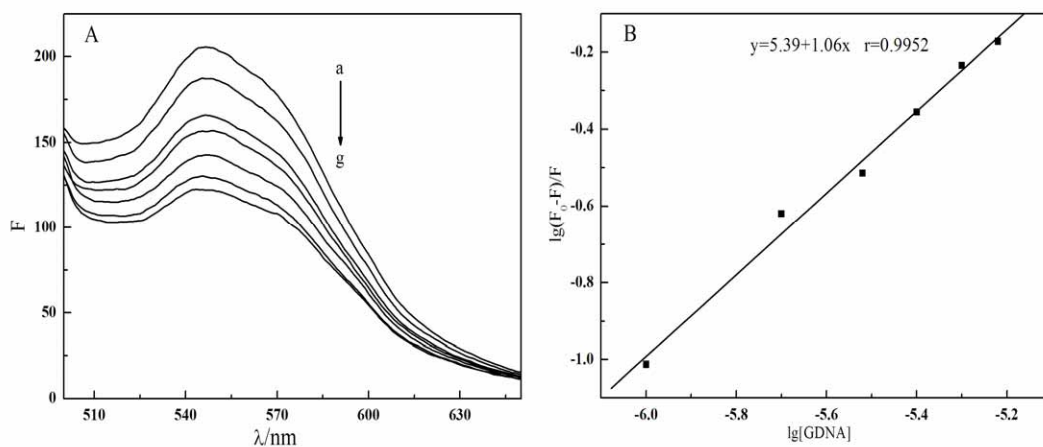

Fig. S2 Fluorescence emission spectra of 38  $\mu$ M AE with different concentration of GDNA (A) and the linear relation between AE and different concentrations of GDNA (B).

Table S1 Effect of ionic strength on the FRET efficiency.

| Medium                      | 5 nM AE $(F-F_0)/F_0$ | 500 nM AE $(F-F_0)/F_0$ |
|-----------------------------|-----------------------|-------------------------|
| 20 mM Tris-HCl              | ----                  | -0.027                  |
| 20 mM Tris-HCl, 50 mM NaCl  | ----                  | 0.049                   |
| 20 mM Tris-HCl, 100 mM NaCl | 0.025                 | 0.18                    |
| 20 mM Tris-HCl, 150 mM NaCl | ----                  | -0.034                  |
